# Supplementary material
Source: PubMed Central journal article supplement (PMC2716083)
Supplement: NIHMS123811-supplement-1_si_001.pdf [file NIHMS123811-supplement-1_si_001.pdf]

## Optimization of FeMoco Maturation on NifEN

Janice M. Yoshizawa, Michael A. Blank, Aaron W. Fay, Chi Chung Lee, Jared A. Wiig, Yilin Hu, Keith O. Hodgson, Britt Hedman, Markus W. Ribbe

### Supporting Information

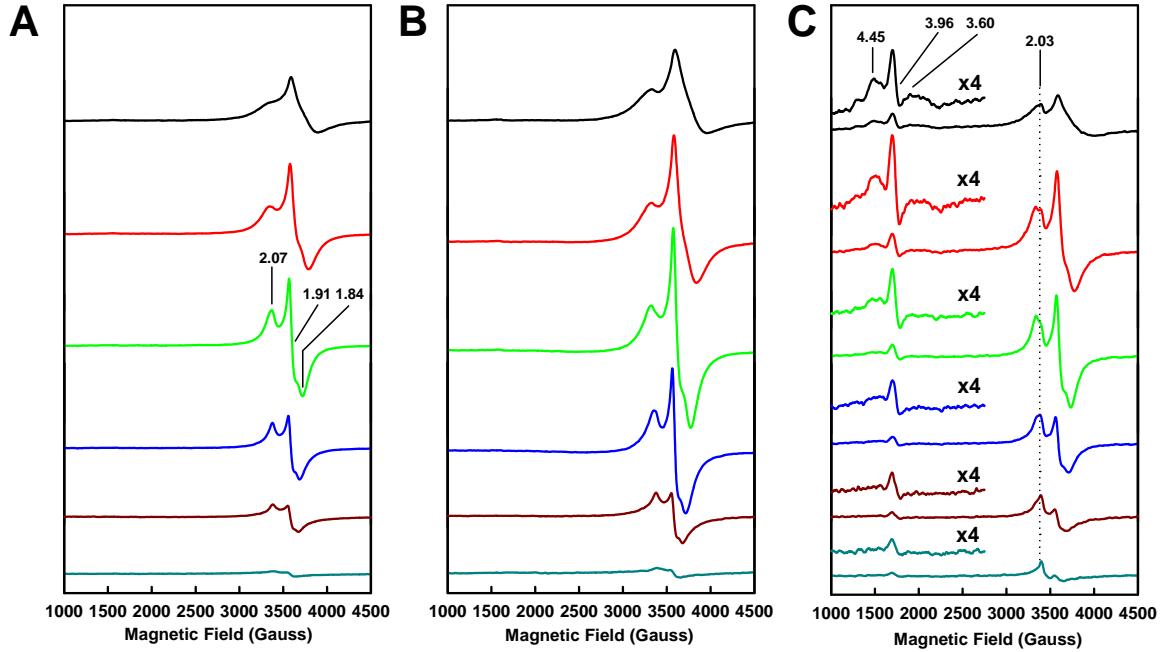

**Figure S1.** Temperature-dependency of EPR spectra of  $\Delta nifB$  NifEN (A), NifEN<sup>Precursor</sup> (B) and NifEN<sup>FeMoco</sup>(20 mM) (C) in dithionite-reduced states. The precursor-free  $\Delta nifB$  NifEN (A) contains two permanent [Fe<sub>4</sub>S<sub>4</sub>] clusters at the  $\alpha/\beta$  subunit interface, which gives rise to an  $S = 1/2$  signal; whereas NifEN<sup>Precursor</sup> (B) contains, in addition to the permanent [Fe<sub>4</sub>S<sub>4</sub>] clusters, a FeMoco precursor that gives rise to a signal that overlaps with the  $S = 1/2$  signal of the [Fe<sub>4</sub>S<sub>4</sub>] clusters, which accounts for the differences in signal intensity and temperature- and power-dependency between the EPR spectra of NifEN<sup>Precursor</sup> and  $\Delta nifB$  NifEN.<sup>1</sup> In contrast to both  $\Delta nifB$  NifEN and NifEN<sup>Precursor</sup>, NifEN<sup>FeMoco</sup>(20 mM) (C) contains a “FeMoco”, which gives rise to additional features in both  $S = 3/2$  and  $S = 1/2$  regions. The  $S = 3/2$  signals of NifEN<sup>FeMoco</sup>(20 mM) are enlarged, and the  $g$  values are given.

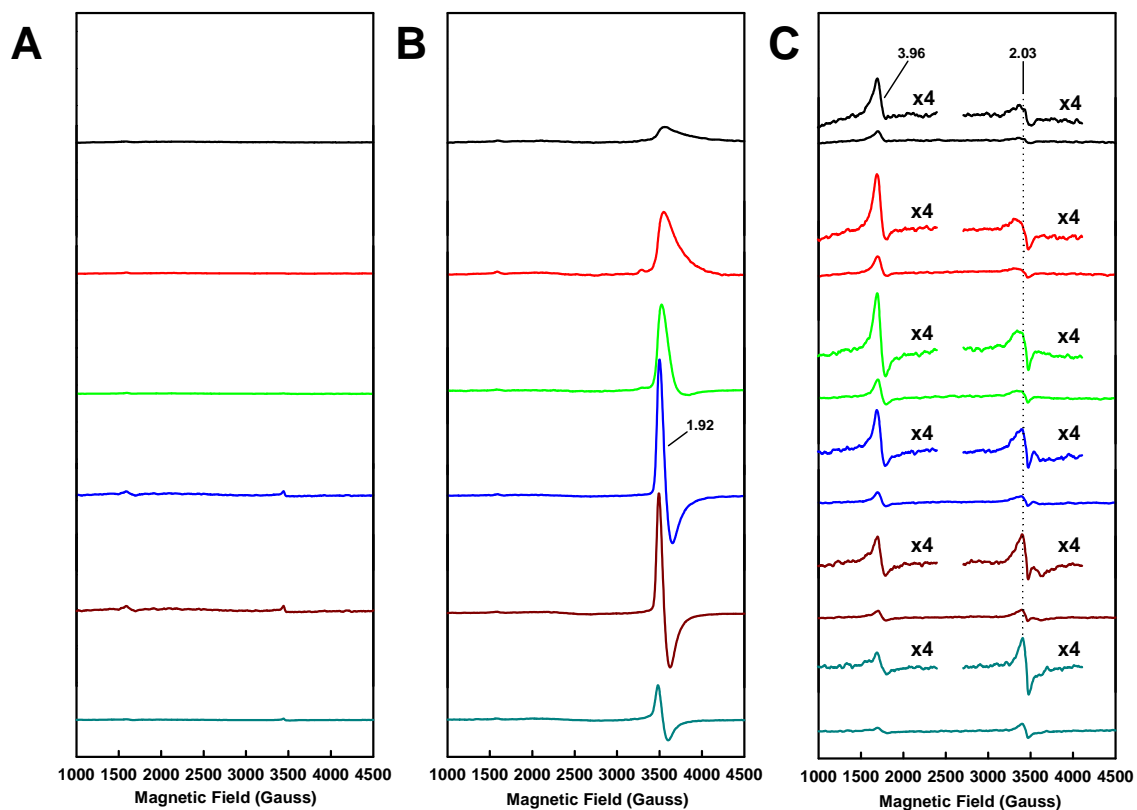

**Figure S2.** Temperature-dependency of EPR spectra of  $\Delta nifB$  NifEN (A),  $NifEN^{Precursor}$  (B) and  $NifEN^{FeMoco(20\text{ mM})}$  (C) in IDS-oxidized states. The precursor-free  $\Delta nifB$  NifEN (A) is EPR-silent upon IDS oxidation; whereas  $NifEN^{Precursor}$  (B) displays a precursor-specific signal at  $g = 1.92$ .<sup>1</sup> In the case of  $NifEN^{FeMoco(20\text{ mM})}$  (C), the features at  $g = 3.96$  and 2.03 remain upon IDS oxidation. These features of  $NifEN^{FeMoco(20\text{ mM})}$  are enlarged, and the  $g$  values are given.

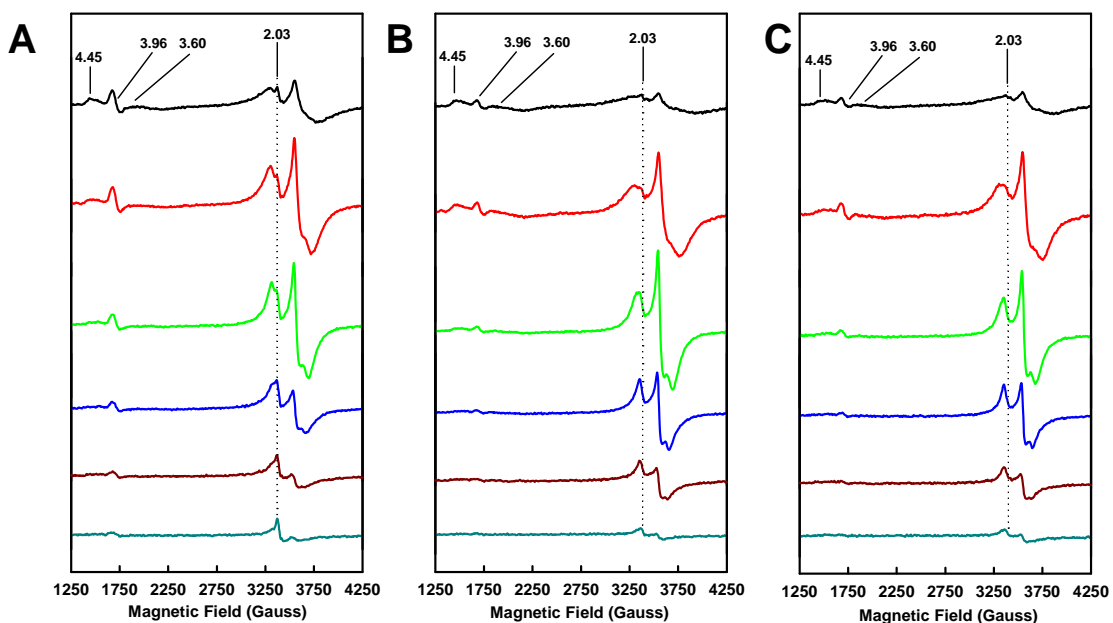

**Figure S3.** Temperature-dependency of EPR spectra of NifEN<sup>“FeMoco”</sup>(20 mM) (A), NifEN<sup>“FeMoco”</sup>[Ti(III) citrate] (B) and NifEN<sup>“FeMoco”</sup>(Fld\_1) (C) in dithionite-reduced states. All three NifEN species display the characteristic features of “FeMoco”, including the  $S = 3/2$  signal with  $g$  values of 4.45, 3.96 and 3.60, and the  $g = 2.03$  feature in the  $S = 1/2$  region.

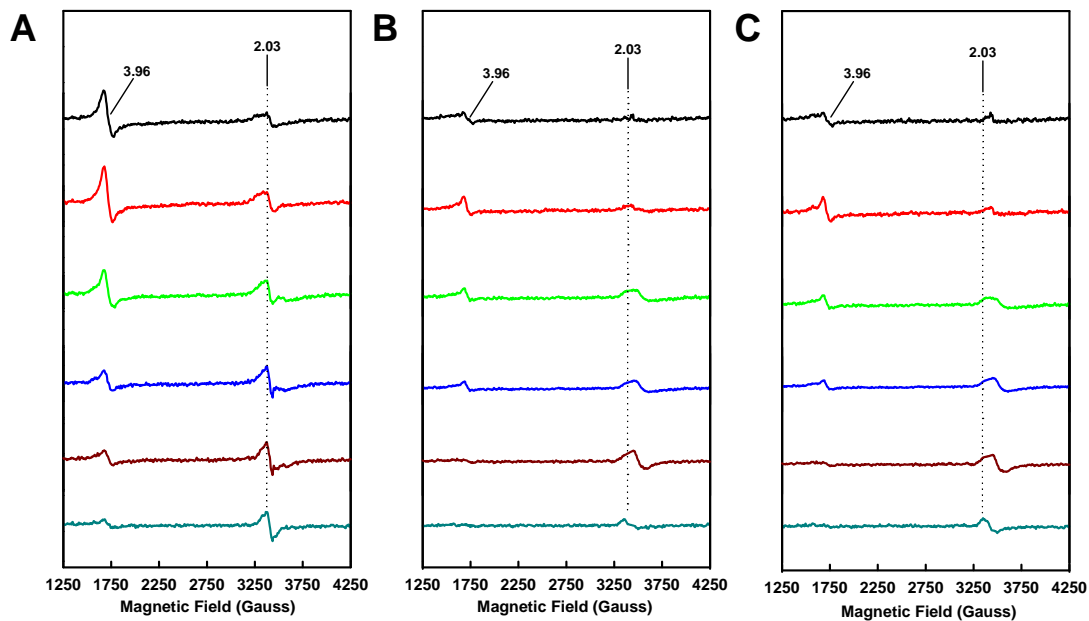

**Figure S4.** Temperature-dependency of EPR spectra of NifEN<sup>“FeMoco”</sup>(20 mM) (A), NifEN<sup>“FeMoco”</sup>[Ti(III) citrate] (B) and NifEN<sup>“FeMoco”</sup>(Fld\_1) (C) in IDS-oxidized states. All three NifEN species display the characteristic features of “FeMoco”, including the  $g = 3.96$  feature in the  $S = 3/2$  region, and the  $g = 2.03$  feature in the  $S = 1/2$  region.

## References

- (1) Hu, Y.; Fay, A. W.; Ribbe, M. W. *Proc. Natl. Acad. Sci. USA* **2005**, *102*, 3236-3241.
